# Supplementary material for: First decade of atmospheric electricity observations at Świder Observatory
Source: Copernicus journal article supplement (doi:10.5194/hgss-2025-9), 2025-10-01
Supplement: Supplementary file [file hgss-2025-9-AC1-supplement.pdf]

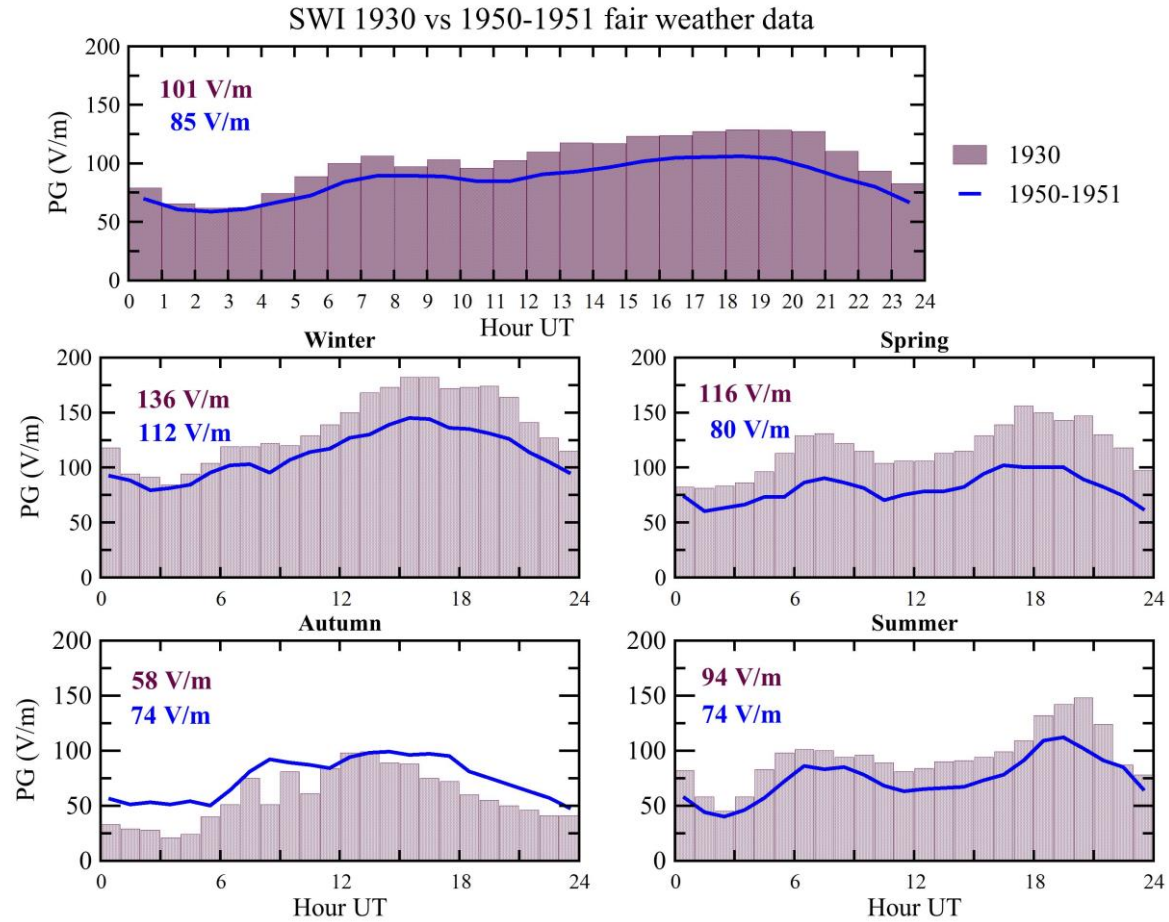

Fig. 3. Average diurnal variation of fair-weather (simple criteria: PG positive values, no thunderstorms and precipitation) electric potential gradient (PG) measured in Świder in 1930 (bars), and in 1950-1951 (solid line). Year-average variations are shown in the upper panel, and the seasonal curves are shown in the four panels below. Mean average values are displayed in the top left corner.
